# Supplementary material for: Overcoming barriers to reprogramming and differentiation in nonhuman primate induced pluripotent stem cells
Source: Copernicus journal article supplement (doi:10.5194/pb-4-153-2017), 2017-08-18
Supplement: Supplementary file 1 [file pb-4-153-2017-supplement.zip]

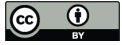

*Supplement of*

**Overcoming barriers to reprogramming and differentiation in  
nonhuman primate induced pluripotent stem cells**

**Jacob J. Hemmi et al.**

*Correspondence to:* Peter J. Hornsby ([hornsby@uthscsa.edu](mailto:hornsby@uthscsa.edu))

- [pb-4-153-2017-supplement-title-page.pdf](#)
- [qPCR values.xlsx](#)

The copyright of individual parts of the supplement might differ from the CC BY 3.0 License.
