# Supplementary material for: Overcoming barriers to reprogramming and differentiation in nonhuman primate induced pluripotent stem cells
Source: Copernicus journal article supplement (doi:10.5194/pb-4-153-2017), 2017-08-18
Supplement: Supplementary file 1 [file qPCR values.xlsx]

## Sheet: Marm vals
		Day 0			Day 6			Day 0 (.5% DMSO)			Day 6 (.5% DMSO)
		Mean	SD		Mean	SD		Mean	SD		Mean	SD
Newborn	NCAD	13.5302	0.683567		9.07265	0.607949		12.4357	0.619435		9.58779	0.242578
	POU3F1	15.0002	0.342147		11.9156	0.313966		15.5178	0.845461		11.9248	0.701474
	SOX1	16.7355	1.06794		11.0705	0.548695		16.7557	0.647427		12.2893	0.625413
	NKX6.1	12.3106	1.0126		9.26767	0.637658		12.8487	0.767962		8.60876	0.790806
	OLIG2	14.8048	0.381635		11.1653	0.872542		14.842	0.440117		10.9405	0.840181
4 yo	NCAD	13.5282	0.681507		9.07164	0.885207		13.4901	0.47452		9.23174	0.404977
	POU3F1	15.4919	1.07437		12.6695	0.773142		15.6352	1.01948		11.2263	0.264652
	SOX1	16.4594	1.36992		11.71	0.814179		16.2521	1.16271		11.4642	0.748975
	NKX6.1	13.0332	0.49837		9.95512	0.869318		13.5021	0.248575		10.098	0.637282
	OLIG2	14.4919	0.339336		11.7868	0.236841		15.4491	0.436846		10.1933	0.29294
7 yo	NCAD	13.1	0.518378		9.41663	0.74341		13.1544	0.821976		8.61037	1.09106
	POU3F1	15.216	0.468024		12.5628	0.661259		14.4941	0.56718		10.4396	0.588684
	SOX1	16.1975	0.721751		13.9012	0.757863		15.8612	0.744894		11.8884	0.502531
	NKX6.1	13.105	0.408129		11.3546	0.651581		13.1586	0.913678		9.96264	0.888154
	OLIG2	15.0144	0.289508		13.8299	0.362885		15.573	0.369718		12.1427	0.801637
13 yo 1A	NCAD	12.4339	0.725669		11.4288	0.560339		13.549	0.562187		10.0411	0.531142
	POU3F1	14.4734	0.275294		13.5018	1.13547		14.5864	0.837446		10.8717	0.109353
	SOX1	17.4908	1.27369		14.4675	0.847566		16.3937	0.676094		11.3011	0.872726
	NKX6.1	13.4384	0.448118		11.7203	0.39721		12.9394	0.354294		9.76019	0.800387
	OLIG2	15.0541	0.217888		13.396	0.221887		15.3229	0.623513		11.6602	0.504482
13 yo 2A	NCAD	13.1453	0.331682		12.3888	0.84977		12.8764	0.70582		10.2848	0.491256
	POU3F1	15.0718	0.201229		13.1622	1.06368		15.2144	0.103343		10.9088	0.304097
	SOX1	18.1343	0.344506		13.913	0.614055		17.8116	0.434853		11.8929	1.31559
	NKX6.1	13.4399	0.667067		12.0108	0.579907		13.3088	0.85511		9.48998	0.220046
	OLIG2	15.153	0.433095		14.1154	0.634395		16.2125	0.799167		11.1	0.409603
13 yo 1B	NCAD	13.0909	0.278662		12.3863	0.355803		12.7568	0.926947		9.88488	0.694803
	POU3F1	14.3662	0.1959		13.7412	1.918		13.976	1.35382		10.7853	1.10218
	SOX1	15.7949	0.92706		14.0763	0.62229		16.0192	0.898014		11.4311	0.800562
	NKX6.1	13.878	0.443787		11.9509	0.395582		13.8151	0.283873		8.55235	0.405572
	OLIG2	14.6389	0.580773		13.9563	0.958808		14.9033	0.965017		9.69464	0.398239
13 yo 2B	NCAD	13.5355	1.03614		13.2004	0.491448		12.8731	0.485704		10.8177	0.467683
	POU3F1	14.5594	0.971166		12.7003	0.65397		15.782	0.599388		10.919	0.379317
	SOX1	18.7023	1.4581		12.3087	0.0679742		18.9468	0.384724		13.6439	0.623267
	NKX6.1	13.293	1.11759		12.8551	0.220933		12.5927	0.562523		9.61115	0.155711
	OLIG2	16.0136	0.150197		14.0147	0.2924		13.4379	0.13163		11.1398	1.14723
13 yo 1C	NCAD	12.0938	0.661005		11.7995	1.9633		12.2555	0.984372		10.7744	0.640393
	POU3F1	14.2484	0.98123		15.0205	0.257812		14.2287	0.864182		10.6931	0.884145
	SOX1	16.3463	0.466491		15.6985	1.35855		16.5361	0.63561		11.2763	0.944182
	NKX6.1	13.4327	0.7662		13.197	0.852736		13.7046	1.44159		8.76029	0.587545
	OLIG2	14.3714	1.22563		13.8675	0.65065		14.9113	0.491573		9.33273	0.240068
13 yo 2C	NCAD	16.3134	0.8759		13.0121	0.504034		14.5366	0.188225		10.5772	1.09262
	POU3F1	16.9787	0.811073		12.4072	0.820001		15.2234	0.517165		10.1166	1.06996
	SOX1	17.6678	0.776342		14.208	0.457496		19.128	0.395584		13.4066	0.300601
	NKX6.1	12.8114	0.339064		12.9047	1.10603		13.2592	0.315115		9.93237	0.590311
	OLIG2	15.5962	0.64032		14.4629	0.486502		15.5124	0.244398		13.3017	0.301196
13 yo 1	NCAD	12.5395	0.673023		11.8716	1.11741		12.8538	0.924699		10.2335	0.680375
	POU3F1	14.3627	0.527961		14.0878	1.32616		14.2637	0.943811		10.7834	0.712811
	SOX1	16.544	1.11179		14.7475	1.12929		16.3163	0.685821		11.3362	0.760716
	NKX6.1	13.583	0.543285		12.2894	0.856563		13.4864	0.861184		9.02428	0.774801
	OLIG2	14.6881	0.748658		13.7399	0.644979		15.0458	0.658491		10.2292	1.13758
13 yo 2	NCAD	14.3314	1.65103		12.8671	0.663144		13.4287	0.939555		10.5599	0.68328
	POU3F1	14.6727	1.53107		12.7004	0.651002		14.3983	1.34794		10.5937	0.685804
	SOX1	18.1681	0.955611		13.4766	0.965015		18.6288	0.710784		12.9811	1.10864
	NKX6.1	13.1814	0.730269		12.5902	0.769015		13.0536	0.637706		9.67783	0.380106
	OLIG2	15.5876	0.542177		14.1976	0.471834		15.0543	1.31928		11.8472	1.25859

## Sheet: Chimp vals
		Day 0			Day 6			Day 0 (.5% DMSO)			Day 6 (.5% DMSO)
		Mean	SD		Mean	SD		Mean	SD		Mean	SD
pMXs-2a	NCAD	14.1663	0.74219		8.46014	0.682139		14.6259	1.02227		8.51525	0.325232
	POU3F1	15.5734	0.264897		11.6417	0.458099		16.2453	0.473913		11.4923	0.449682
	SOX1	16.7055	0.106936		13.0884	0.0975283		16.4658	0.78945		11.3918	0.553625
	NKX6.1	12.0623	0.336314		11.0362	0.292458		12.7503	0.656082		9.00458	0.37894
	OLIG2	14.6287	0.456226		12.2485	0.0439882		14.6484	0.463532		11.0397	0.71435
SeV1a-1	NCAD	13.5953	0.410473		8.33266	0.426441		13.0985	0.424577		8.62755	0.38166
	POU3F1	17.1909	0.388828		11.2702	0.348692		16.6352	0.753159		11.7618	0.573366
	SOX1	16.35	0.416059		14.4955	0.509268		16.4497	0.439997		12.2027	0.283068
	NKX6.1	13.6054	0.0905124		13.2432	0.253832		13.4901	0.343119		8.97479	0.466923
	OLIG2	15.5702	0.152924		12.3124	0.239136		14.9396	0.882559		10.0093	0.421139
SeV1a-2	NCAD	14.0046	0.481982		9.15654	0.21406		13.5678	1.18808		10.0207	0.242747
	POU3F1	17.7056	0.201918		12.6184	0.953885		17.1921	0.731222		10.6217	0.369171
	SOX1	18.8606	0.217942		12.5373	0.572805		18.7091	0.329874		9.59154	0.161641
	NKX6.1	13.4969	0.335679		13.1636	0.539057		13.2583	0.206358		9.0995	0.267645
	OLIG2	14.5959	0.21987		11.3152	0.377829		13.873	0.74464		11.5261	0.198493
SeV1b-1	NCAD	13.8877	0.644018		13.4359	0.4869		14.6606	0.579975		9.1762	0.208425
	POU3F1	17.4268	0.686026		10.8376	0.186035		16.9265	1.31851		10.8676	0.21522
	SOX1	17.9675	0.0340178		12.3122	0.470978		17.9375	0.274248		13.2235	0.236252
	NKX6.1	12.603	0.388047		11.2248	0.0756529		12.6509	0.392903		8.80293	0.239429
	OLIG2	14.9738	0.187862		11.0124	0.262078		14.0565	0.493305		11.0949	0.564329
A6	NCAD	13.1104	0.392317		10.6082	0.682593		12.0273	0.83307		7.59807	0.283701
	POU3F1	17.2755	0.37681		12.3384	0.387991		17.2782	0.638519		12.0428	0.646344
	SOX1	17.2846	0.255365		10.3989	0.0718764		17.195	0.209798		11.8034	0.488828
	NKX6.1	12.9193	0.504809		12.8546	0.182418		12.5631	0.186716		8.63112	0.309573
	OLIG2	14.8555	0.342334		14.2798	0.172122		15.3152	0.349537		11.0753	0.286857
C1	NCAD	12.416	0.0302503		10.0199	0.448517		11.964	0.260194		8.73141	0.0901312
	POU3F1	16.5811	0.32854		10.8114	0.105413		16.991	0.570705		10.6894	0.10227
	SOX1	17.536	0.599425		14.1428	0.983494		17.4142	0.283962		12.2197	0.248987
	NKX6.1	12.5426	0.611182		12.62	0.318433		12.3897	0.0976953		9.91144	0.261805
	OLIG2	15.4492	0.730766		13.1933	0.137267		15.3109	0.313093		11.0401	0.191175
C5	NCAD	13.4783	0.994578		9.79399	0.0618353		13.747	0.500033		8.51278	0.239659
	POU3F1	14.8961	0.388914		13.4038	0.327776		15.0175	0.489111		10.0344	0.233544
	SOX1	18.7632	0.049137		14.7107	0.40905		18.5161	0.149376		11.4791	0.24553
	NKX6.1	12.9918	0.505098		12.4239	0.334995		12.7585	0.271794		9.14528	0.340553
	OLIG2	12.8434	0.765912		13.2357	0.139051		13.3357	0.889598		10.6631	1.14159
D5	NCAD	14.2161	0.511683		8.94729	0.381804		14.4431	0.323775		7.76803	0.289607
	POU3F1	16.5608	0.114965		13.5886	0.276476		16.8458	0.565055		11.7447	0.459032
	SOX1	17.7557	0.545336		11.9727	0.272317		18.2342	0.396312		10.0779	0.188299
	NKX6.1	12.9424	0.342546		10.4252	0.23384		13.2976	0.202237		9.79798	0.0408061
	OLIG2	13.0571	1.2065		13.7996	0.187025		13.7848	0.468044		10.4408	0.813073
